# Supplementary material for: The Promotion of Migration and Myogenic Differentiation in Skeletal Muscle Cells by Quercetin and Underlying Mechanisms
Source: MDPI journal article supplement (doi:10.3390/nu14194106), 2022-10-02
Supplement: s1 [file s1]

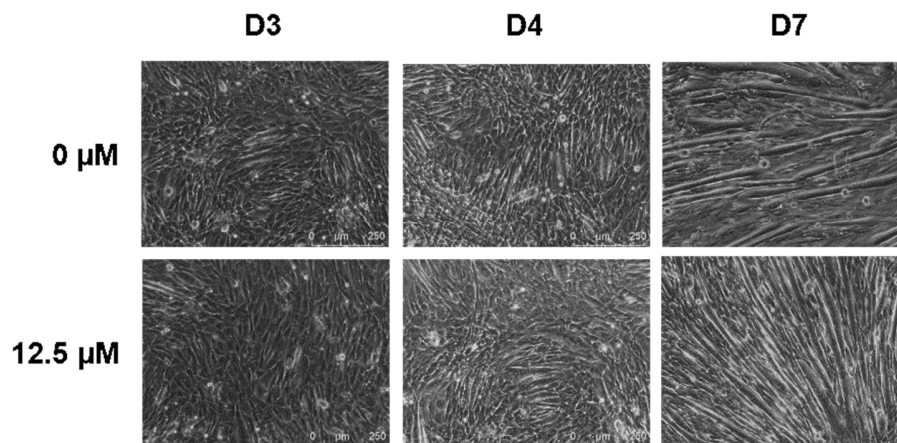

**Figure S1.** Microscope images of C2C12 cells change morphology after 3,4,7 days. Compare cell morphology changing between the control group and quercetin (12.5  $\mu$ M) treatment.

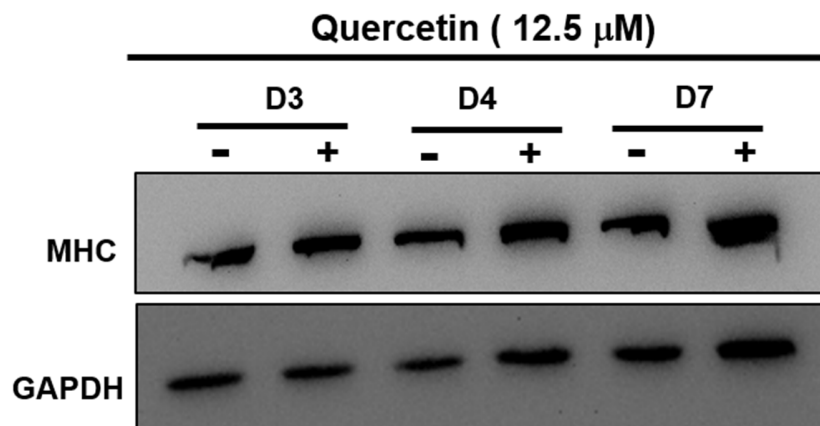

**Figure S2.** MHC protein expression level related to quercetin (12.5  $\mu$ M) and control group after 3,4,7 days of treatment. Western blot analysis was used to determine protein expression of MHC.
